# Supplementary material for: Release characteristics of biochar-derived dissolved organic matter and its impact on Cr( vi ) adsorption and reduction
Source: Royal Society of Chemistry journal article supplement (doi:10.1039/d4ra06172a), 2024-01-01
Supplement: d4ra06172a1.pdf [file d4ra06172a1.pdf]

*Supplementary Materials*

A manuscript submitted to *RSC Advances*

**Do not overlook the biochar-derived dissolved organic matter in real Cr-contaminated environment: leaching dynamics, its impacts on Cr(VI) adsorption and reduction**

Hui Liu<sup>a,1</sup>, Ying Wang<sup>a,1</sup>, Shixu Wang<sup>a</sup>, Jing Wu<sup>a</sup>, Yulai Wang<sup>a,\*</sup>

<sup>a</sup> *School of Energy and Environment, Anhui University of Technology, Maanshan City 243002, China;*

---

**\*Corresponding Author:**

Yulai Wang, E-mail: [yulai\\_wang@163.com](mailto:yulai_wang@163.com), School of Energy and Environment, Anhui University of Technology, Maanshan City 243002, China

Table S1 The UV-vis spectral indicators of HC-AP and BDOM.

| Sample                                                     | HC-AP        | HC-DOM       | PC-DOM       | HPC-DOM     |
|------------------------------------------------------------|--------------|--------------|--------------|-------------|
| SUVA <sub>280</sub> (L·mg <sup>-1</sup> ·m <sup>-1</sup> ) | 7.84±0.08    | 7.45±0.15    | 1.46±0.29    | 1.21±0.44   |
| S <sub>275-295</sub> (nm <sup>-1</sup> )                   | 0.022±0.0009 | 0.011±0.0001 | 0.028±0.0009 | 0.033±0.002 |
| Ha-L                                                       | 0.59±0.011   | 0.51±0.022   | 0.57±0.012   | 0.52±0.015  |
| Fa-L                                                       | 0.082±0.001  | 0.12±0.007   | 0.20±0.006   | 0.22±0.004  |
| SMP                                                        | 0.22±0.007   | 0.21±0.007   | 0.13±0.009   | 0.13±0.011  |
| Ar-P                                                       | 0.10±0.005   | 0.17±0.021   | 0.11±0.008   | 0.13±0.019  |

**Table S2** The calculated leaching parameters of BDOM and its fluorescence components based on the first order kinetics model.

| Indices                 | Biochars | $q=ae^{-kt}+q_0$ |       |                | R <sup>2</sup> | P      |
|-------------------------|----------|------------------|-------|----------------|----------------|--------|
|                         |          | a                | k     | q <sub>0</sub> |                |        |
| BDOC                    | HC       | -288.49          | 0.030 | 288.49         | 0.9746         | <0.001 |
|                         | PC       | -9.84            | 0.016 | 9.84           | 0.9637         | <0.001 |
|                         | HPC      | -2.29            | 0.032 | 2.29           | 0.9498         | <0.001 |
| <i>a</i> <sub>280</sub> | HC       | -26.28           | 0.017 | 26.28          | 0.9858         | <0.001 |
|                         | PC       | -2.71            | 0.036 | 2.71           | 0.8743         | <0.001 |
|                         | HPC      | -3.20            | 0.092 | 3.20           | 0.9499         | <0.001 |
| FBDOM                   | HC       | -7727.40         | 0.044 | 7727.40        | 0.9880         | <0.001 |
|                         | PC       | -5748.07         | 0.050 | 5748.07        | 0.9891         | <0.001 |
|                         | HPC      | -4807.00         | 0.200 | 4807.00        | 0.9789         | <0.001 |
| Ar-P                    | HC       | -1391.39         | 0.026 | 1391.39        | 0.9885         | <0.001 |
|                         | PC       | -527.80          | 0.044 | 527.80         | 0.9943         | <0.001 |
|                         | HPC      | -780.14          | 0.045 | 780.14         | 0.8557         | <0.001 |
| Fa-L                    | HC       | -953.92          | 0.031 | 953.92         | 0.9878         | <0.001 |
|                         | PC       | -1100.87         | 0.083 | 1100.87        | 0.9973         | <0.001 |
|                         | HPC      | -943.35          | 0.140 | 943.35         | 0.9981         | <0.001 |
| SMP                     | HC       | -1516.59         | 0.143 | 1516.59        | 0.9959         | <0.001 |
|                         | PC       | -645.75          | 0.130 | 645.75         | 0.9976         | <0.001 |
|                         | HPC      | -594.41          | 0.088 | 594.41         | 0.9833         | <0.001 |
| Ha-L                    | HC       | -3810.05         | 0.115 | 3810.05        | 0.9933         | <0.001 |
|                         | PC       | -3181.99         | 0.079 | 3181.99        | 0.9962         | <0.001 |
|                         | HPC      | -2501.57         | 0.134 | 2501.57        | 0.9664         | <0.001 |

**Table S3** The relative contents of Ar-P, Fa-L ,SMP and Ha-L to bulk BDOM derived from HC, PC and HPC.

| Biochars | Ar-P           | Fa-L           | SMP            | Ha-L           |
|----------|----------------|----------------|----------------|----------------|
| HC       | 15.00%-18.02%  | 11.18%-12.23%  | 20.43%-21.36%  | 49.30%-52.49%  |
|          | (16.51%±2.11%) | (11.71%±0.74%) | (20.89%±0.65%) | (50.89%±2.22%) |
| PC       | 9.95%-11.02%   | 19.35%-20.14%  | 12.19%-12.23%  | 56.09%-57.79%  |
|          | (10.5%±0.8%)   | (19.75%±0.56%) | (12.83%±0.90%) | (56.94%±1.19%) |
| HPC      | 11.42%-14.21%  | 21.84%-22.45%  | 12.17%-13.73%  | 51.01%-53.17%  |
|          | (12.8%±1.95%)  | (22.15%±0.43%) | (12.95%±1.09%) | (52.01%±1.51%) |

**Table S4** The kinetic parameters of Cr(VI) based on the pseudo-first-order and pseudo-second-order models.

|       | Pseudo-first-order model |              |        |        | Pseudo-second-order model |              |        |        |
|-------|--------------------------|--------------|--------|--------|---------------------------|--------------|--------|--------|
|       | $K_1$ (h <sup>-1</sup> ) | $Q_e$ (mg/g) | $R^2$  | $P$    | $K_2$ (g/(mg·h))          | $Q_e$ (mg/g) | $R^2$  | $P$    |
| HC    | 0.46                     | 3.93         | 0.9915 | <0.001 | 0.13                      | 4.48         | 0.9957 | <0.001 |
| PC    | 0.51                     | 3.89         | 0.9884 | <0.001 | 0.14                      | 4.41         | 0.9979 | <0.001 |
| HPC   | 0.49                     | 3.89         | 0.9922 | <0.001 | 0.14                      | 4.42         | 0.9969 | <0.001 |
| D-HC  | 0.35                     | 4.03         | 0.9991 | <0.001 | 0.081                     | 4.75         | 0.9836 | <0.001 |
| D-PC  | 0.15                     | 3.68         | 0.9403 | <0.001 | 0.045                     | 4.24         | 0.9766 | <0.001 |
| D-HPC | 0.10                     | 3.73         | 0.9471 | <0.001 | 0.029                     | 4.33         | 0.9761 | <0.001 |

**Table S5** The calculated parameters of BDOM mediated Cr(VI) reduction by Fe(II) based on the single exponential model.

| Experiment systems | BDOM contents | $C_t/C_0 = F_1 + F_2 e^{-kt}$ |        |                        | R <sup>2</sup> |
|--------------------|---------------|-------------------------------|--------|------------------------|----------------|
|                    |               | $F_1$                         | $F_2$  | $k$ (h <sup>-1</sup> ) |                |
| Control (Fe(II))   | 0 mg C/L      | 35.90%                        | 64.10% | 0.42                   | 0.9999         |
|                    | 1 mg C/L      | 37.44%                        | 62.56% | 0.58                   | 0.9978         |
| HC-AP + Fe(II)     | 5 mg C/L      | 32.14%                        | 67.86% | 0.62                   | 0.9924         |
|                    | 10 mg C/L     | 19.10%                        | 80.90% | 0.55                   | 0.9968         |
|                    | 1 mg C/L      | 42.77%                        | 57.23% | 1.23                   | 0.9917         |
| HC-BDOM + Fe(II)   | 5 mg C/L      | 30.71%                        | 69.29% | 0.81                   | 0.9962         |
|                    | 10 mg C/L     | 18.78%                        | 81.23% | 1.06                   | 0.9923         |
|                    | 1 mg C/L      | 35.70%                        | 64.30% | 7.62                   | 0.9999         |
| PC-BDOM + Fe(II)   | 5 mg C/L      | 39.29%                        | 60.71% | 25.18                  | 0.9999         |
|                    | 10 mg C/L     | 53.70%                        | 46.30% | 308.67                 | 0.9999         |
|                    | 1 mg C/L      | 34.41%                        | 65.59% | 9.28                   | 0.9999         |
| HPC-BDOM + Fe(II)  | 5 mg C/L      | 37.30%                        | 62.70% | 19.32                  | 0.9999         |
|                    | 10 mg C/L     | 41.40%                        | 58.60% | 353.67                 | 0.9999         |

Figures:

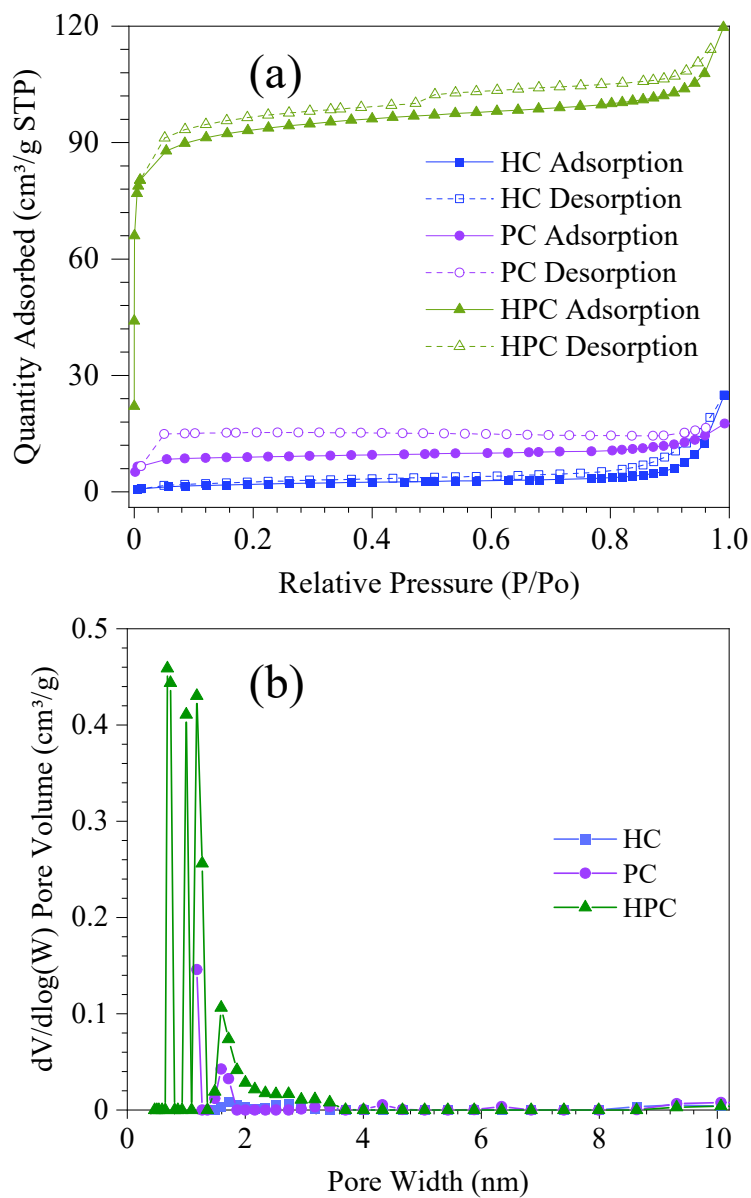

Fig. S1 (a) N<sub>2</sub> sorption–desorption isotherms and (b) pore size distributions curves of biochars.

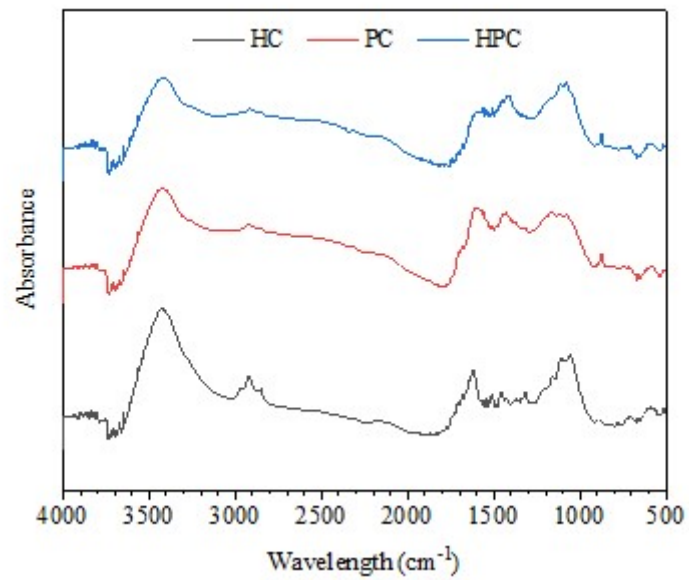

**Fig. S2** FT-IR spectra of biochars.



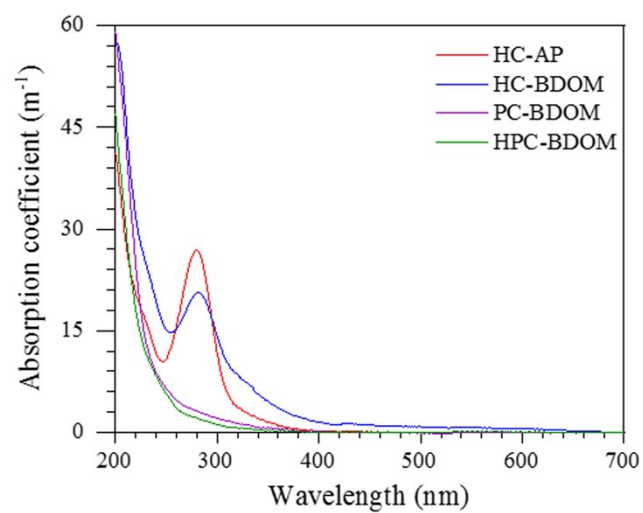

**Fig. S3** UV-Vis spectra of BDOM derived from hydrochars and pyrochars.

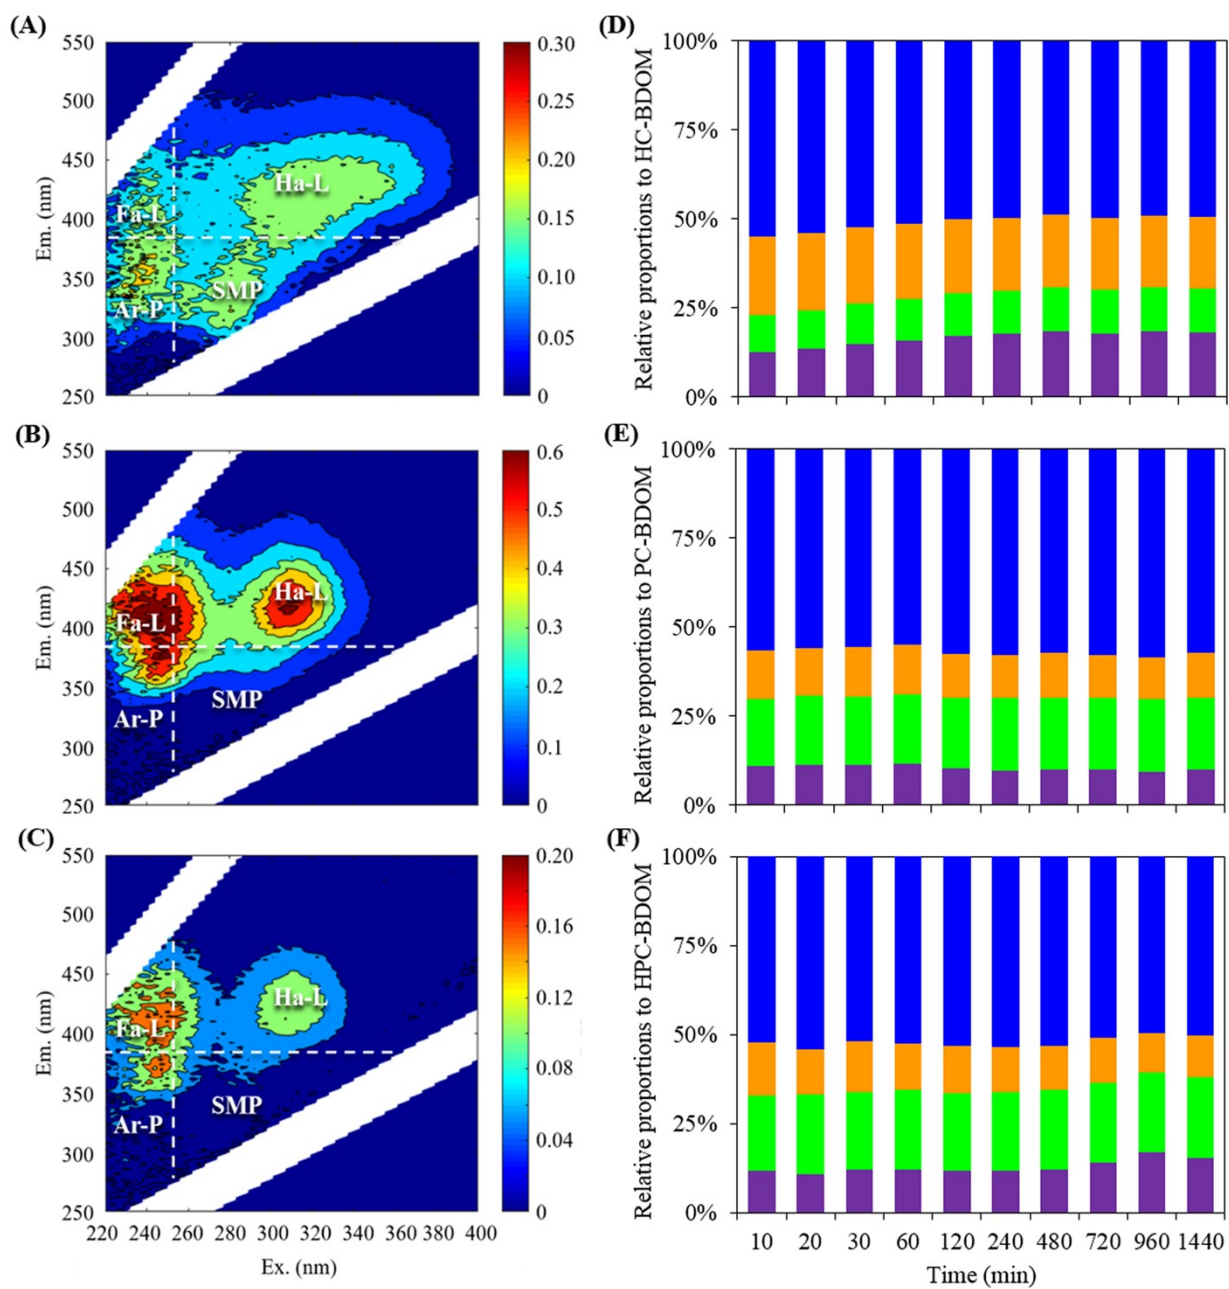

**Fig. S4** Excitation emission matrix (EEM) fluorescence spectra and corresponding distribution of fluorescence intensity of DOM extracted from HC (A, D), PC (B, E) and HPC (C, F).

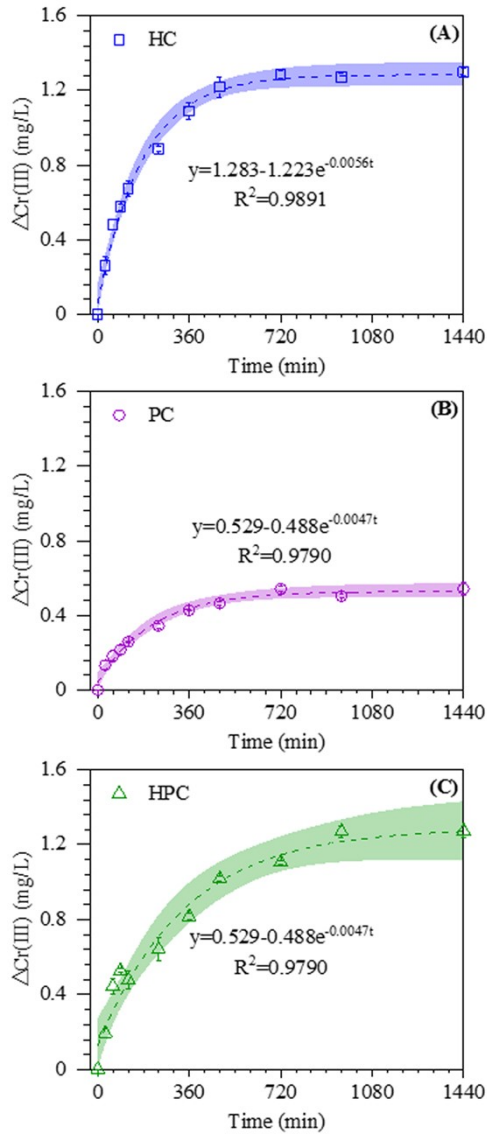

**Fig. S5** The Cr(III) concentration residued in solution during the adsorption of Cr(VI) over HC (A), PC (B) and HPC (C). Experimental conditions: pH 2; biochar dosage: 0.5 g/L; Cr(VI) concentration: 2 mg/L.

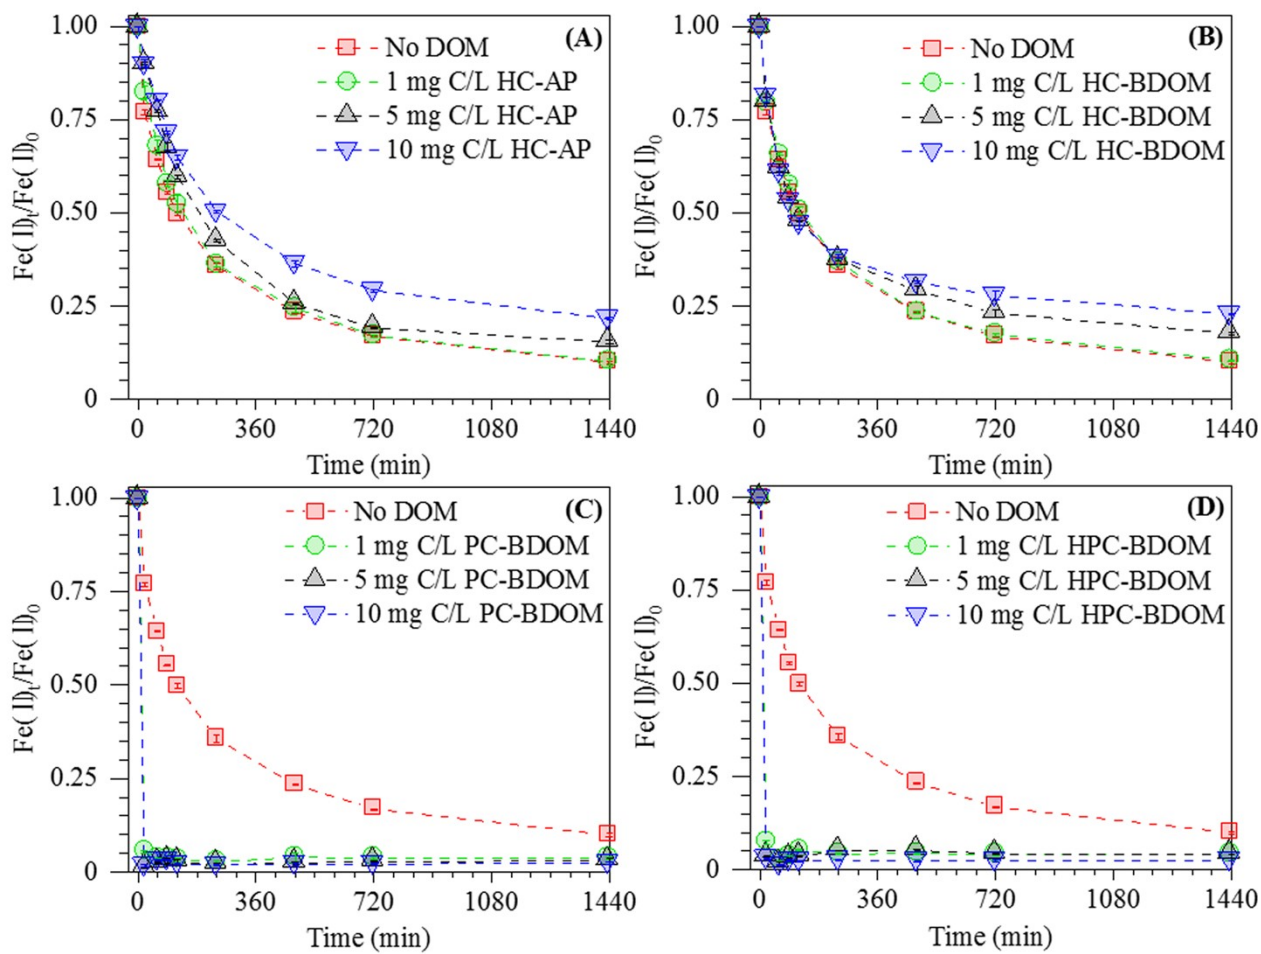

**Fig. S6** The changes in Fe(II) during the reaction of Cr(VI) reduction by BDOM-Fe(II) system.

Experimental conditions: pH 2; Cr(VI) concentration: 2 mg/L; Fe(II) concentration: 4 mg/L.
